# Supplementary material
Source: HighWire-hosted journal article supplement (https://jnm.snmjournals.org/highwire/filestream/95223/field_highwire_adjunct_files/0/197350_Supplemental_Data.pdf)
Supplement: 197350_Supplemental_Data.pdf [file 197350_Supplemental_Data.pdf]

**SUPPLEMENTAL TABLE 1.** Acquisition parameters of the head and neck magnetic resonance imaging sequences.

|                         | <b>Slice mm</b> | <b>Gap mm</b> | <b>TR ms</b> | <b>TE ms</b> | <b>Scan type</b> | <b>TI ms</b> | <b>B-value</b> |
|-------------------------|-----------------|---------------|--------------|--------------|------------------|--------------|----------------|
| <b>STIR</b>             | 5               | 0,5           | 5909         | 70           | 2D/IR            | 165          |                |
| <b>T1w</b>              | 4               | 0,4           | 586          | 15           | 2D/TSE           |              |                |
| <b>T2w</b>              | 4               | 0,4           | 3742         | 80           | 2D/TSE           |              |                |
| <b>DWI</b>              | 4               | 0             | 11711        | 104          | 2D/GRA           |              | 0+800          |
| <b>T1w gd<br/>Trans</b> | 4               | 0,4           | 586          | 15           | 2D/TSE           |              |                |
| <b>T1w gd<br/>Cor</b>   | 4               | 0,4           | 558          | 14           | 2D/TSE           |              |                |

STIR=Short-TI Inversion Recovery, T1w=T1 weighted image, T2w=T2 weighted image DWI=Diffusion weighted imaging, TR ms= Repetition time in milliseconds, TE ms=Echo time in milliseconds, TI ms=Iversion time in milliseconds, 2D/IR= Two-Dimensional Inversion-Recovery, 2D/TSE= Two-Dimensional Turbo Spin-Echo, 2D/GRA= Two-Dimensional Gradient-Echo.

**SUPPLEMENTAL TABLE 2.** Location of detected distant metastases in 18 of 307 patients with disseminated head and neck squamous cell carcinoma\*.

| <b>Site</b>      | <b>No. of Patients (%)</b> |
|------------------|----------------------------|
| Lung             | 13 (72%)                   |
| Mediastinal node | 5 (28%)                    |
| Bone             | 4 (22%)                    |
| Liver            | 2 (11%)                    |
| Pleura           | 1 (6%)                     |
| Muscle           | 1 (6%)                     |

\*The individual patient may have distant metastasis to one or more tumor sites.

**SUPPLEMENTAL TABLE 3.** The net reclassification improvement (NRI) for carcinoma staging based on 18F-fluoro-deoxy-glucose-positron emission tomography/computed tomography scan (PET/CT) compared to chest X-ray + magnetic resonance imaging of the head and neck (CXR/MRI), with all-cause mortality as endpoint.

|                                 | PET/CT stage       |                  |            |                  |             |                                       |
|---------------------------------|--------------------|------------------|------------|------------------|-------------|---------------------------------------|
| CXR/MRI                         | Number of patients |                  |            | Reclassified (%) |             |                                       |
|                                 | Localized          | Locally advanced | Metastatic | Up-staged        | Down-staged | Net correctly classified              |
| <b>Patients alive (n=245)</b>   |                    |                  |            |                  |             |                                       |
| Localized                       | 83                 | 36               | 2          | 45 (18.4%)       | 7 (2.9%)    | -15.5%                                |
| Locally advanced                | 5                  | 110              | 7          |                  |             |                                       |
| Metastatic                      | 0                  | 2                | 0          |                  |             |                                       |
| <b>Patients died (n=62)</b>     |                    |                  |            |                  |             |                                       |
| Localized                       | 5                  | 9                | 2          | 22 (35.5%)       | 1 (1.6%)    | 33.9%                                 |
| Locally advanced                | 1                  | 33               | 11         |                  |             |                                       |
| Metastatic                      | 0                  | 0                | 1          |                  |             |                                       |
| <b>NRI (95% CI)<br/>p-value</b> |                    |                  |            |                  |             | <b>18.4% (2.2% to 34.6%)<br/>0.03</b> |

CI = confidence interval.

**SUPPLEMENTAL TABLE 4:** The net reclassification improvement (NRI) for carcinoma staging based on 18F-fluoro-deoxy-glucose-positron emission tomography/computed tomography scan (PET/CT) compared to chest computed tomography + magnetic resonance imaging of the head and neck (CCT/MRI), with all-cause mortality as endpoint.

| CCT/MRI                       | PET/CT stage       |                  |            |                  |             |                              |
|-------------------------------|--------------------|------------------|------------|------------------|-------------|------------------------------|
|                               | Number of patients |                  |            | Reclassified (%) |             |                              |
|                               | Localized          | Locally advanced | Metastatic | Up-staged        | Down-staged | Net correctly classified     |
| <b>Patients alive (n=245)</b> |                    |                  |            |                  |             |                              |
| Localized                     | 59                 | 31               | 2          | 37 (15.1%)       | 60 (24.5%)  | 9.4%                         |
| Locally advanced              | 3                  | 86               | 4          |                  |             |                              |
| Metastatic                    | 26                 | 31               | 3          |                  |             |                              |
| <b>Patients died (n=62)</b>   |                    |                  |            |                  |             |                              |
| Localized                     | 3                  | 8                | 0          | 13 (21.0%)       | 13 (21.0%)  | 0.0%                         |
| Locally advanced              | 1                  | 24               | 5          |                  |             |                              |
| Metastatic                    | 2                  | 10               | 9          |                  |             |                              |
| <b>NRI (95% CI)</b>           |                    |                  |            |                  |             | <b>9.4% (-8.6% to 27.4%)</b> |
| <b>p-value</b>                |                    |                  |            |                  |             | <b>0.31</b>                  |

CI = confidence interval.
